# Supplementary material for: HBPEI-grafted carbon nanotubes for the effective retention of Pd2+ and Pt2+ through complexation
Source: Royal Society of Chemistry journal article supplement (doi:10.1039/c8qi00320c), 2018-01-01
Supplement: c8qi00320c1.pdf [file c8qi00320c1.pdf]

## HBPEI-grafted carbon nanotubes for the effective retention of Pd<sup>2+</sup> and Pt<sup>2+</sup> through complexation

Víctor K. Abdelkader-Fernández, F. Morales-Lara, M<sup>a</sup> Dolores López de la Torre, Manuel Melguizo, F. Javier López-Garzón, María Domingo-García, Manuel Pérez-Mendoza.

### Electronic Supplementary Information

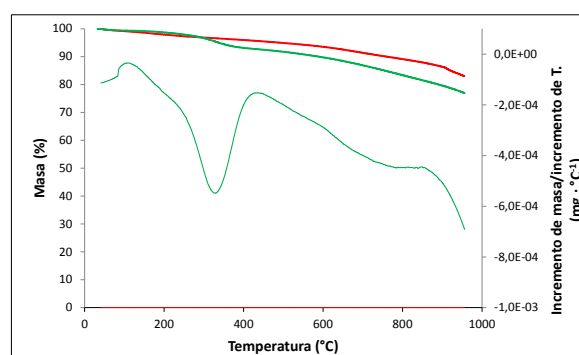

S1. TG of the pristine nanotubes (red) and MWCNT/8.3 (green). The DTG of the latter is also shown.

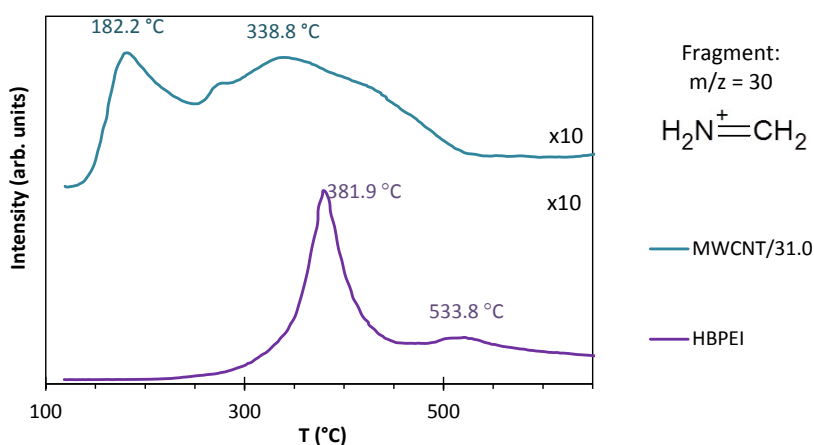

S2. TPD of the m/z=30 fragment of the pure HBPEI and MWCNT/30.9 hybrid.

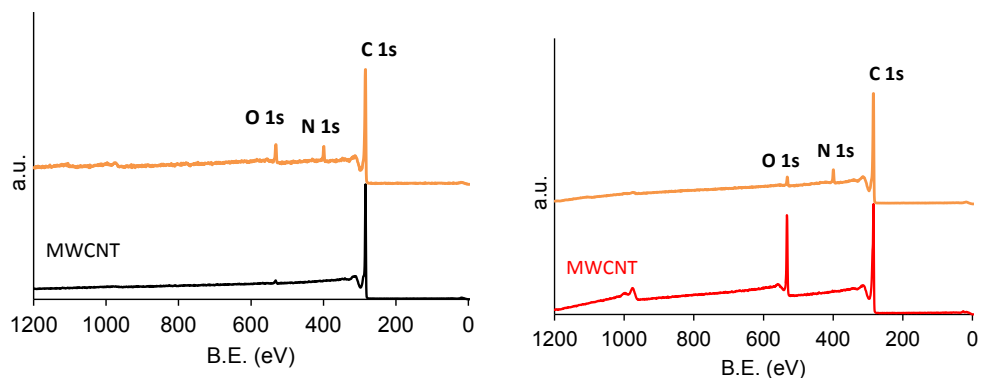

S3. Left: XPS wide spectra of the original nanotubes (MWCNT, black) and after the functionalization with HBPEI (orange). Right: XPS wide spectra of oxidized carbon nanotubes (red) and after the functionalization with HBPEI (orange).

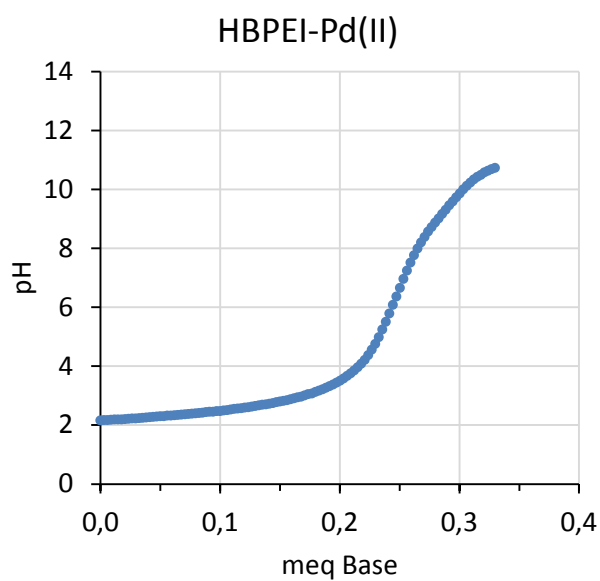

Figure S4. Potentiometric titration plot of the  $\text{Pd}^{2+}$ -HBPEI complexes in aqueous solution.

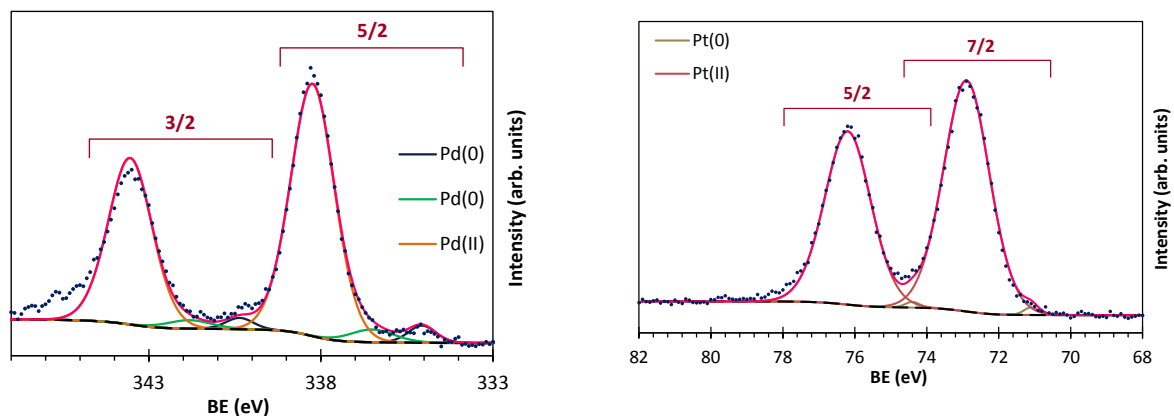

Figure S5. XPS high resolution spectra of sample MWCNT/22.9 after the capture of Pd<sup>2+</sup> (left) and Pt<sup>2+</sup> (right). The deconvolution of the 3d peak of Pd<sup>2+</sup> and 4f peak of Pt<sup>2+</sup> shows the vast majority of both metals are as M<sup>2+</sup>.

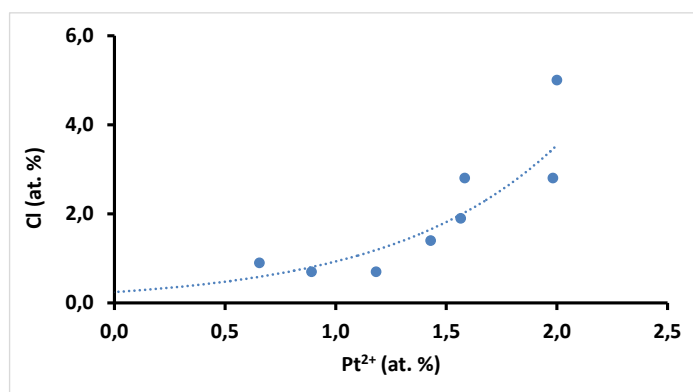

S6. Amount of chloride content versus the Pt<sup>2+</sup> content for hybrids MWCNT/HBPEI .

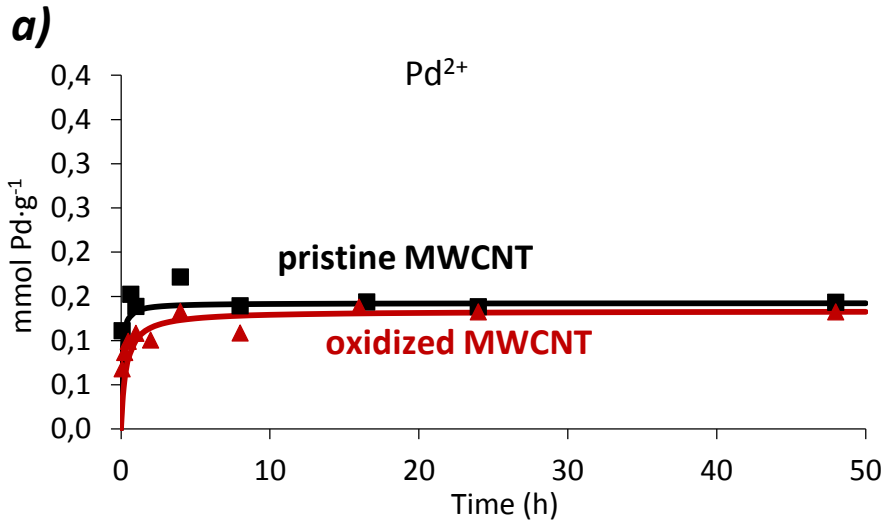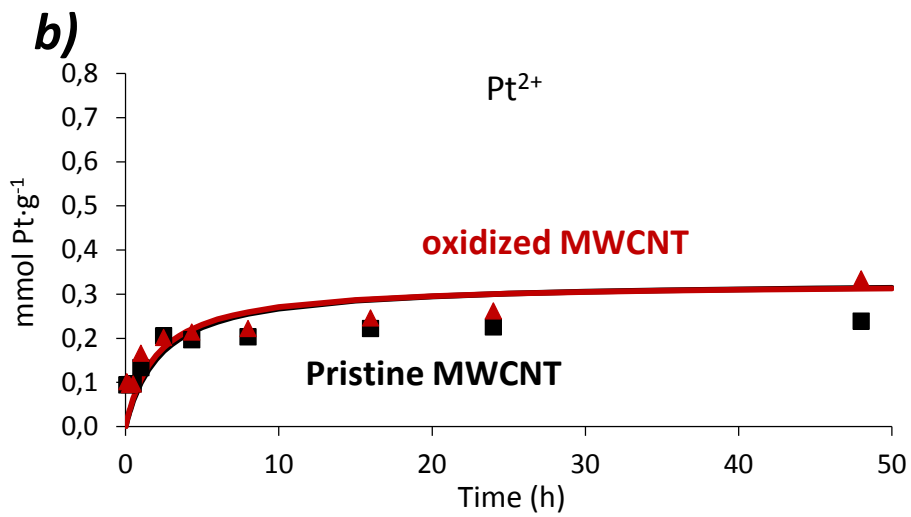

S7. Retention of metal ions by Pristine MWCNT and oxidized MWCNTs .
